# Supplementary material for: Controlled decationization of X zeolite: mesopore generation within zeolite crystallites for bulky molecular adsorption and transformation
Source: Royal Society of Chemistry journal article supplement (doi:10.1039/c3ta11256j), 2013-01-01
Supplement: c3ta11256j.pdf [file c3ta11256j.pdf]

Supplementary Information for

## **Controlled Decationization of X Zeolite: Mesopore Generation within Zeolite Crystallites for Bulky Molecular Adsorption and Transformation**

**Songhyun Lee,<sup>‡</sup> Hyeonbin Kim<sup>‡</sup> and Minkee Choi\***

### **Table of Contents**

**Fig. S1** TEM image of NaX zeolite

**Fig. S2** TEM image of *decatX*-0.51 sample

**Fig. S3** TEM image of HCl-treated NaX sample

**Fig. S4** TEM image of Na<sub>2</sub>H<sub>2</sub>EDTA-treated NaX sample

**Fig. S5** Ar adsorption-desorption isotherms (87 K) of the *decatX*-0.51, Na<sub>2</sub>H<sub>2</sub>EDTA-treated NaX and HCl -treated NaX

**Fig. S6** XRD patterns of the fully NH<sub>4</sub><sup>+</sup>-exchanged X zeolite after the thermal treatment at various temperatures

**Fig. S7** Adsorption isotherms of basic dyes on NaX, *decatX*-0.51, Na<sub>2</sub>H<sub>2</sub>EDTA-treated NaX and HCl -treated NaX at 298 K. (a) Methylene blue and (b) crystal violet

**Fig. S8** Conversion of ethyl cyanoacetate in Knoevenagel condensation with 10 wt% K<sub>2</sub>O/KX, 10 wt% K<sub>2</sub>O/*decatX*-0.51, 10 wt% K<sub>2</sub>O/KX-Na<sub>2</sub>H<sub>2</sub>EDTA and 10 wt% K<sub>2</sub>O/KX-HCl as a catalyst

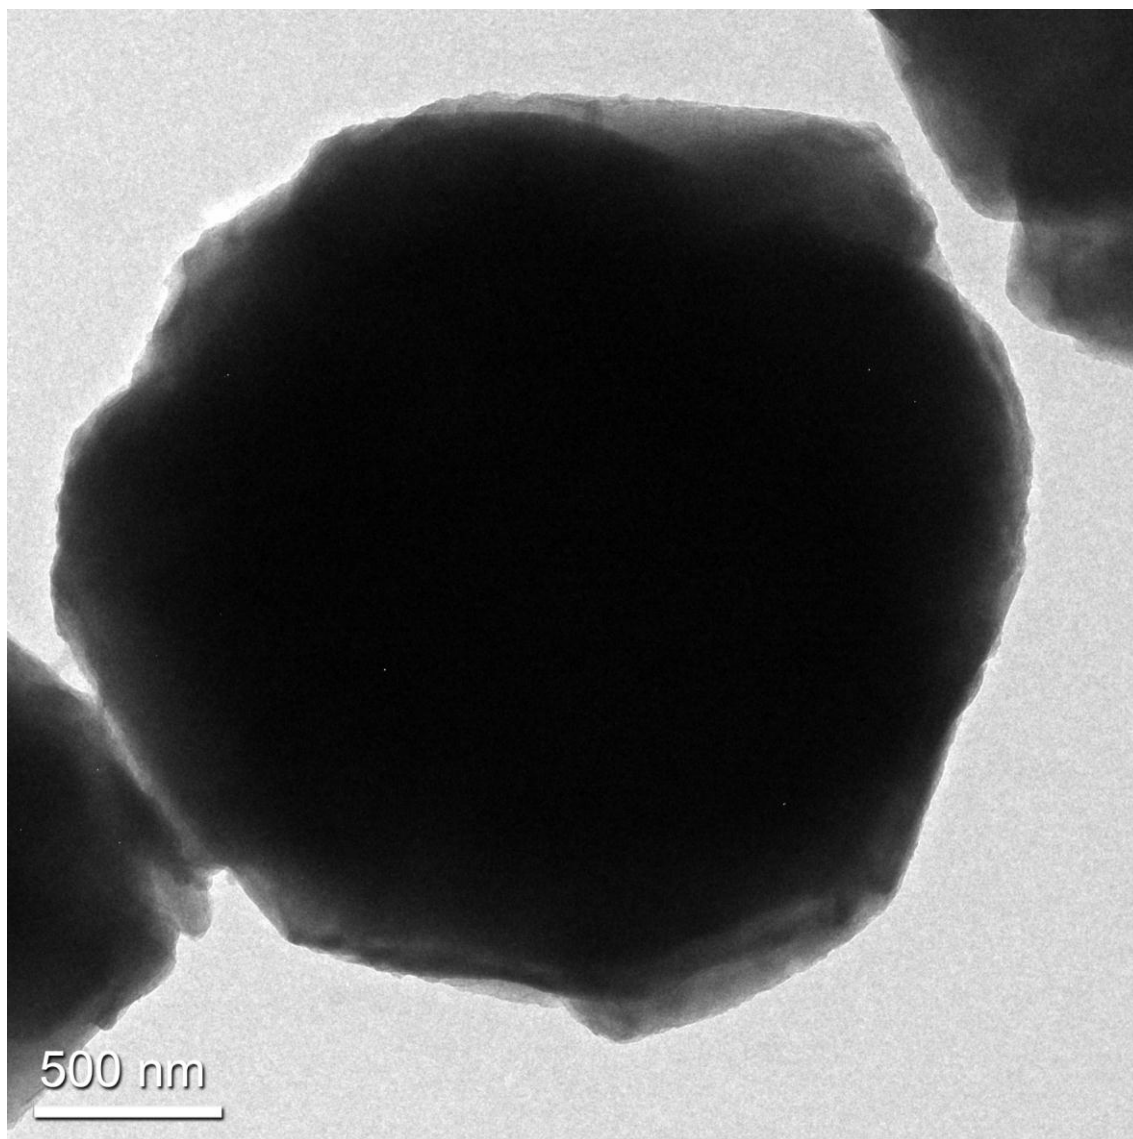

**Fig. S1** TEM image of NaX zeolite

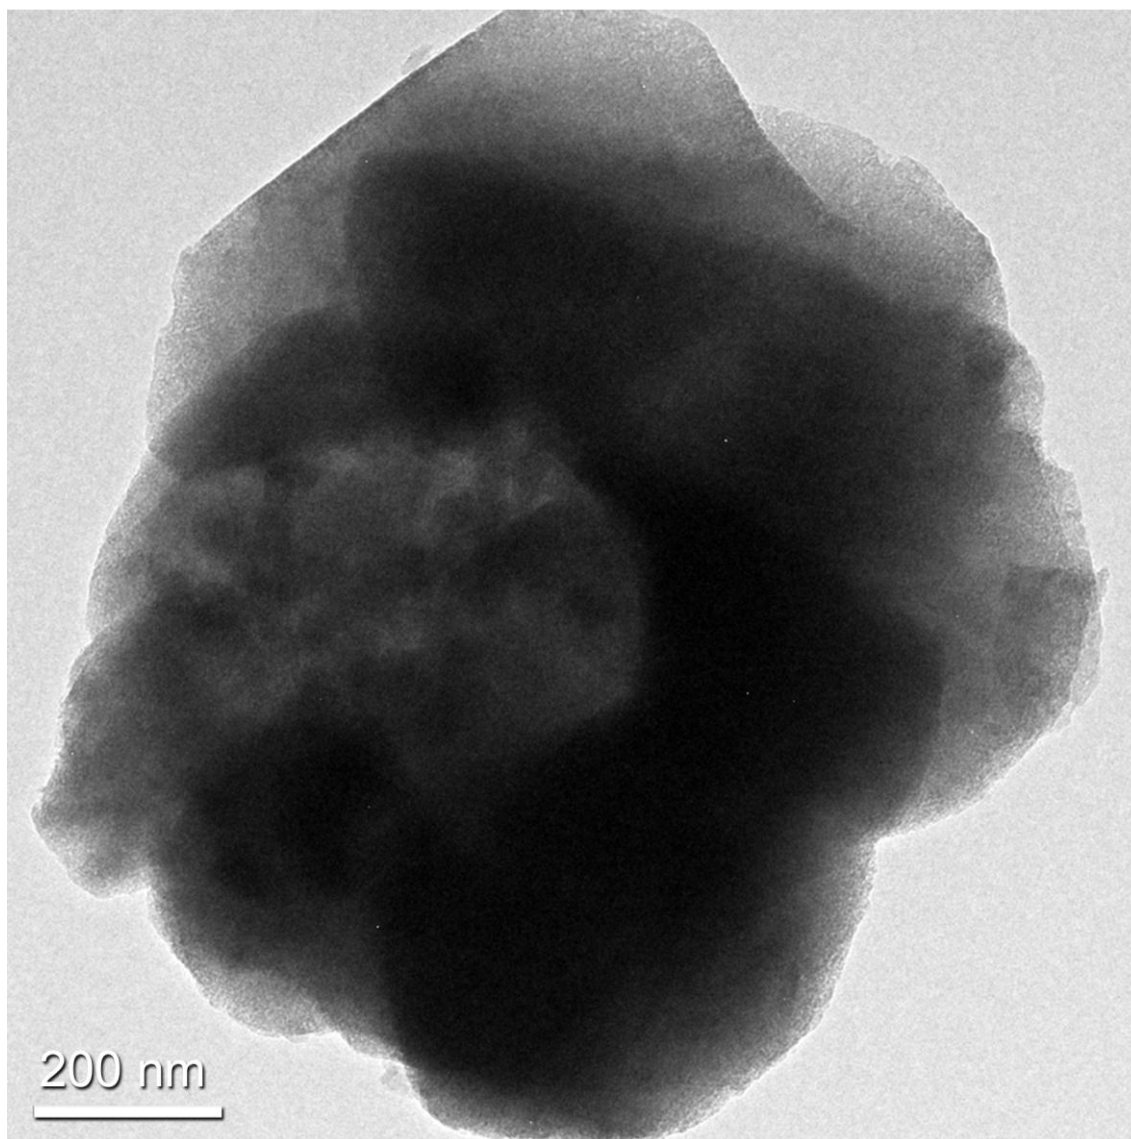

**Fig. S2** TEM image of *decatX*-0.51 sample

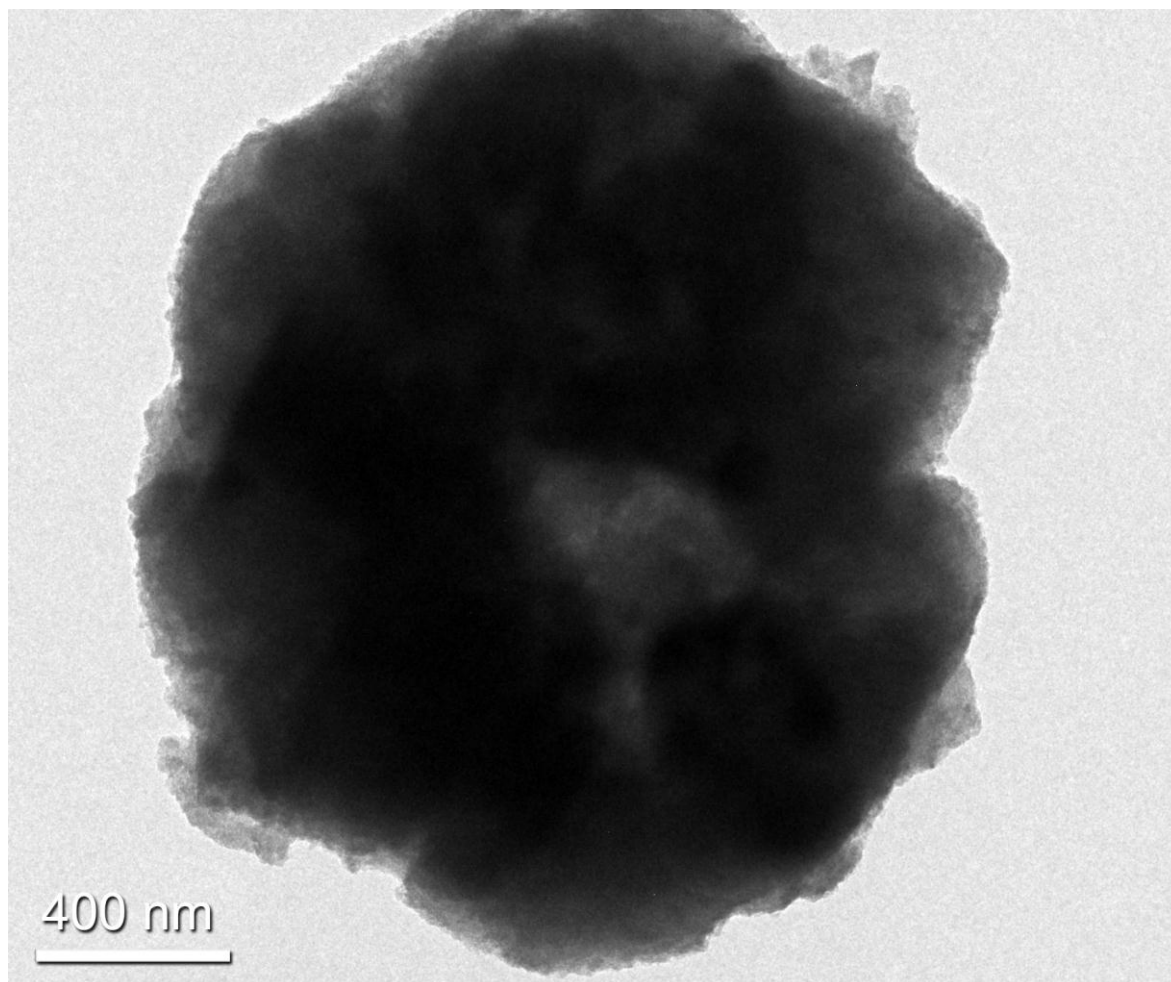

**Fig. S3** TEM image of HCl-treated NaX sample

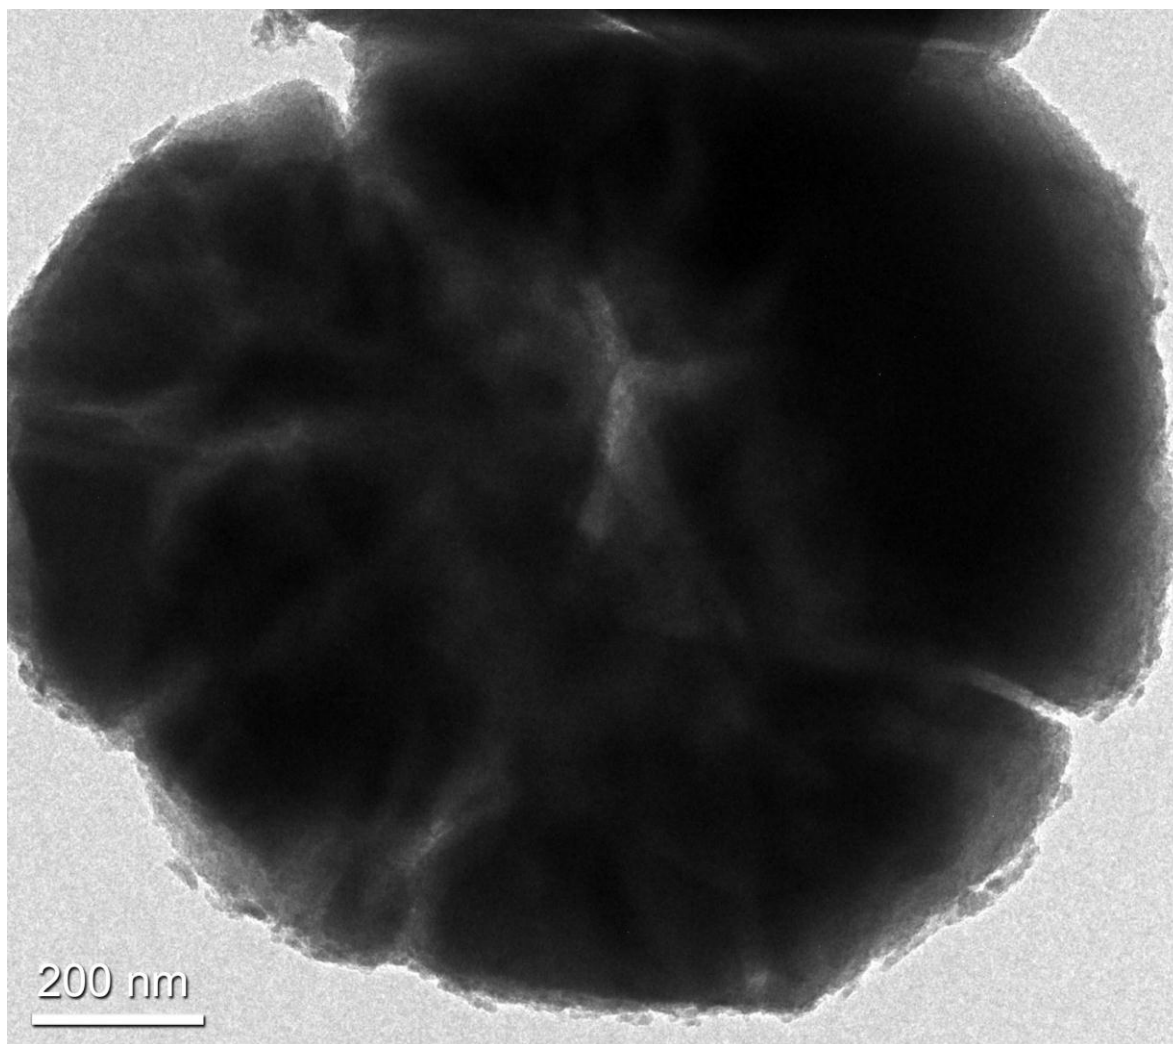

**Fig. S4** TEM image of Na<sub>2</sub>H<sub>2</sub>EDTA-treated NaX sample

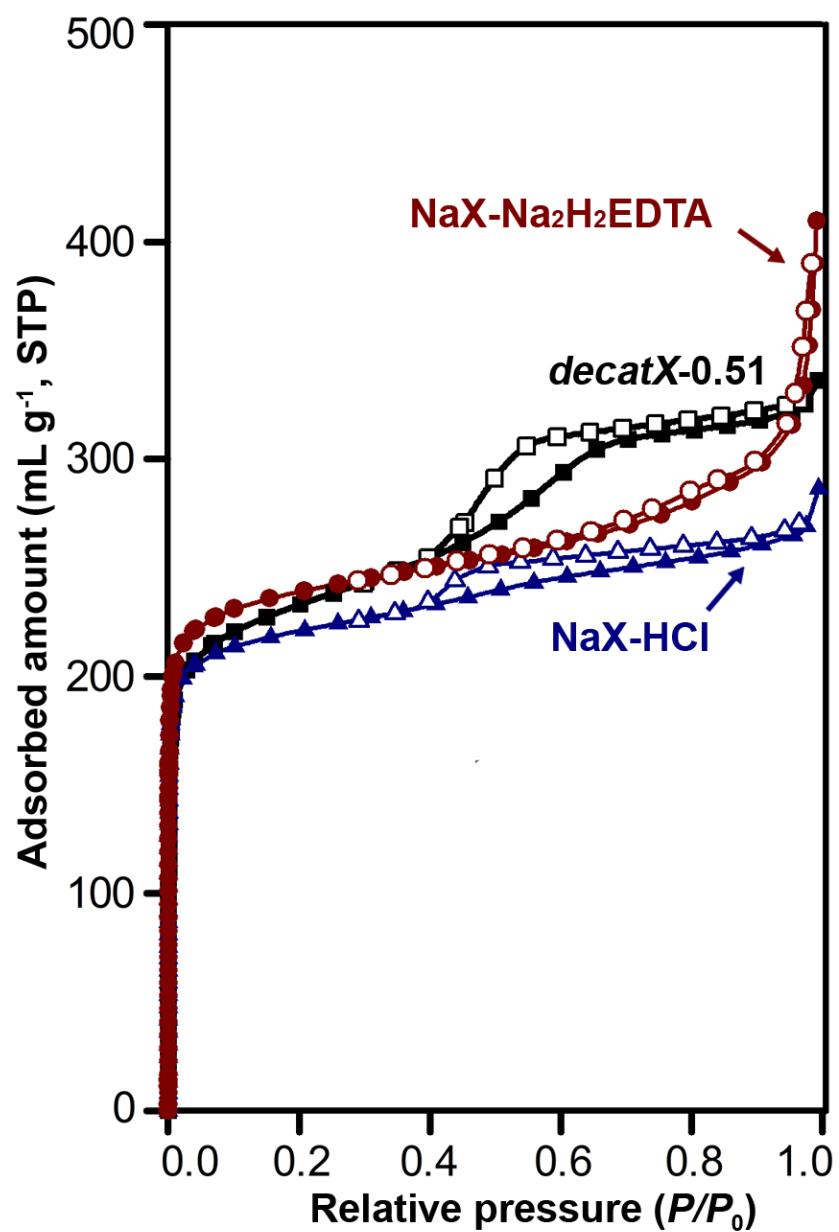

**Fig. S5** Ar adsorption-desorption isotherms (87 K) of the *decatX-0.51*, Na<sub>2</sub>H<sub>2</sub>EDTA-treated NaX and HCl -treated NaX

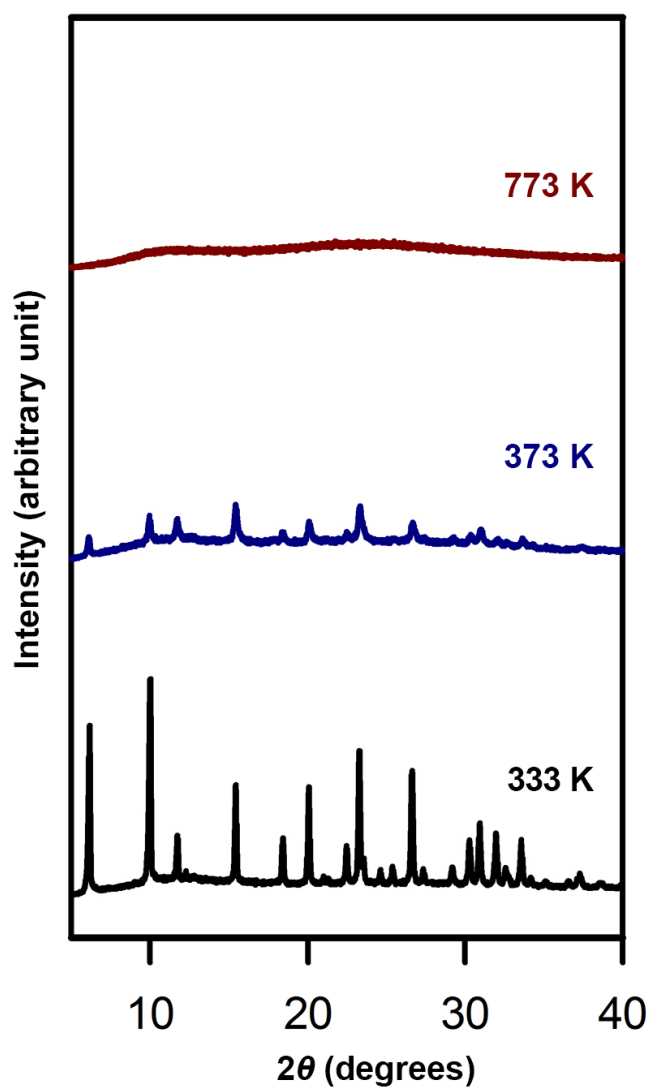

**Fig. S6** XRD patterns of the fully  $\text{NH}_4^+$ -exchanged X zeolite after the thermal treatment at various temperatures

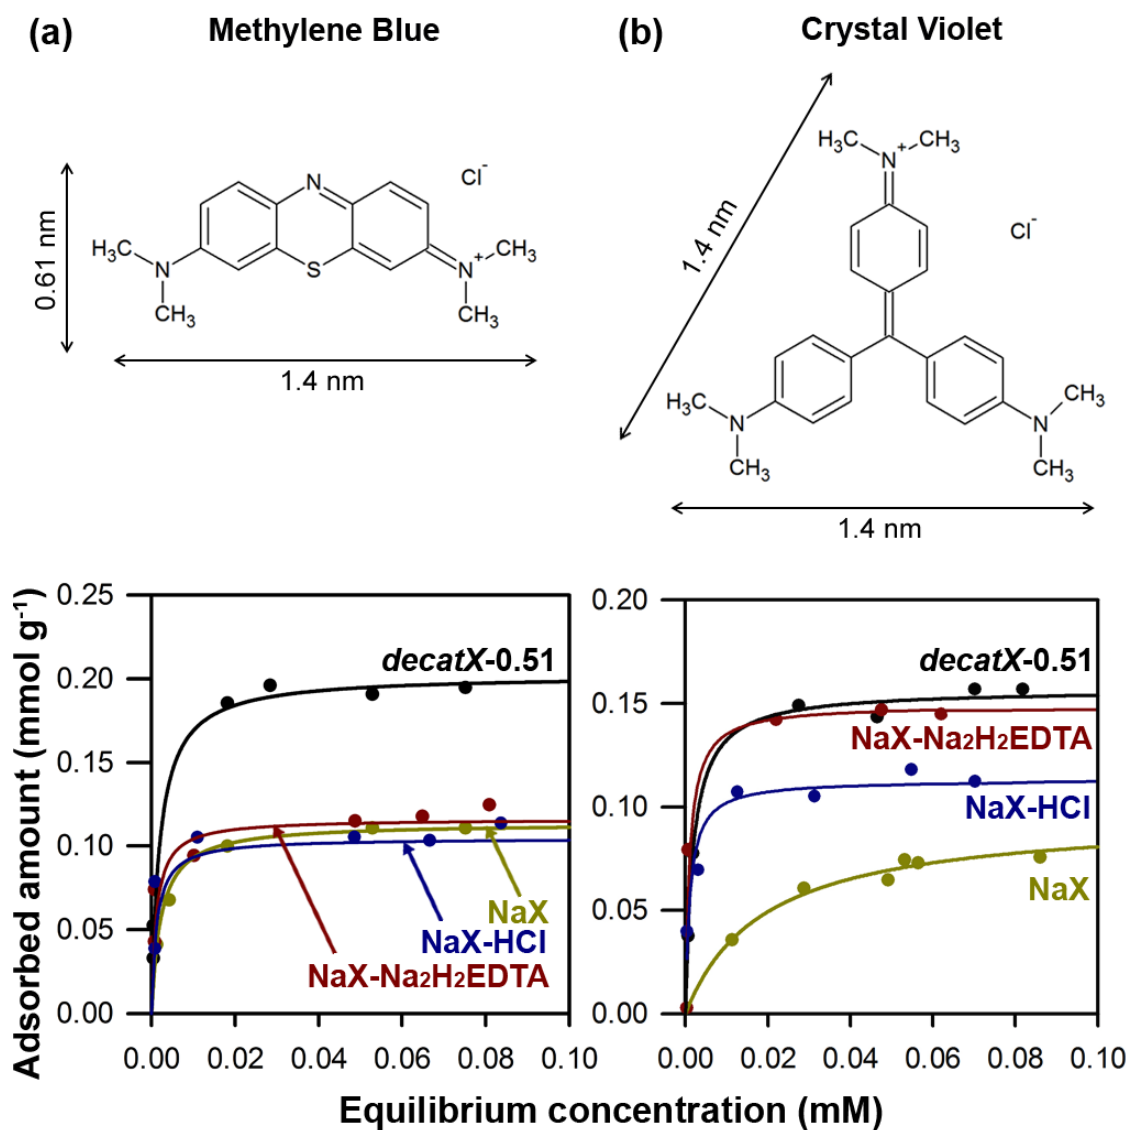

**Fig. S7** Adsorption isotherms of basic dyes on NaX, *decatX-0.51*,  $\text{Na}_2\text{H}_2\text{EDTA}$ -treated NaX and HCl- treated NaX at 298 K. (a) Methylene blue and (b) crystal violet

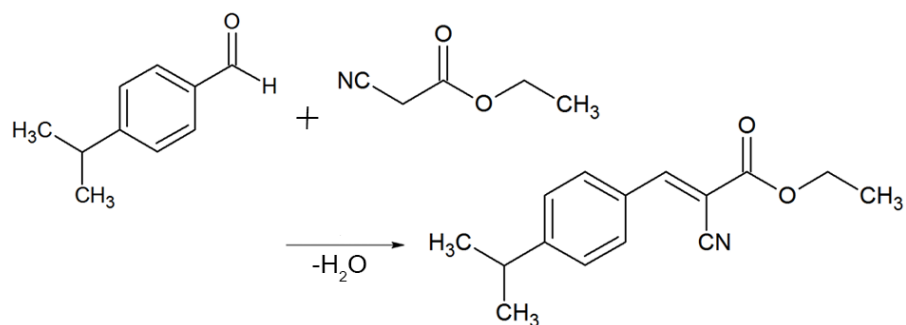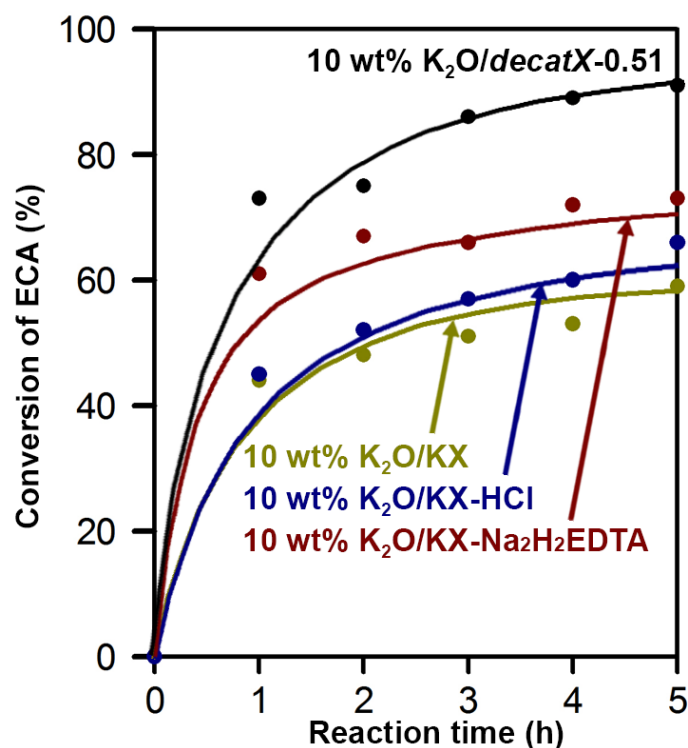

**Fig. S8** Conversion of ethyl cyanoacetate in Knoevenagel condensation with 10 wt%  $\text{K}_2\text{O}/\text{KX}$ , 10 wt%  $\text{K}_2\text{O}/\text{decatX-0.51}$ , 10 wt%  $\text{K}_2\text{O}/\text{KX-Na}_2\text{H}_2\text{EDTA}$  and 10 wt%  $\text{K}_2\text{O}/\text{KX-HCl}$  as a catalyst. Chemically leached NaX zeolite with  $\text{Na}_2\text{H}_2\text{EDTA}$  and HCl were ion-exchanged with excessive amount of  $\text{K}^+$  ion (3 g samples were ion-exchanged twice in 200 mL of 0.3 M  $\text{KNO}_3$ ). 1 g of  $\text{K}^+$ -exchanged samples were impregnated with 3 M of  $\text{KNO}_3$  to achieve 10 wt%  $\text{K}_2\text{O}$ . The impregnated samples were dried at 373 K for 24 h and calcined in a plug-flow reactor under flowing dry air ( $250 \text{ mL min}^{-1}$ ) at 773 K (temperature ramp:  $2 \text{ K min}^{-1}$ ) for 3 h. The resultant samples were designated as 10 wt%  $\text{K}_2\text{O}/\text{KX-Na}_2\text{H}_2\text{EDTA}$  and 10 wt%  $\text{K}_2\text{O}/\text{KX-HCl}$ , respectively.
